# Supplementary material
Source: MDPI journal article supplement (https://www.mdpi.com/2379-139X/7/2/15)
Supplement: s1 [file s1]

**Supplementary Digital Content SDC1:** ALSFRS-R Scores and corresponding TRATE measures for each longitudinal dataset

| Longitudinal Data | Visit 1        |             |                                           | Visit 2        |             |                                           |
|-------------------|----------------|-------------|-------------------------------------------|----------------|-------------|-------------------------------------------|
|                   | ALSFRS-R Total | ALSFRS-R LL | TRATE [mM <sup>-1</sup> s <sup>-1</sup> ] | ALSFRS-R Total | ALSFRS-R LL | TRATE [mM <sup>-1</sup> s <sup>-1</sup> ] |
| <b>P1</b>         | 42             | 7           | 92.06                                     | 42             | 7           | 79.95                                     |
| <b>P2</b>         | 39             | 6           | 69.38                                     | 39             | 6           | 57.41                                     |
| <b>P3</b>         | 36             | 4           | 73.33                                     | 31             | 3           | 53.40                                     |
| <b>P4</b>         | 32             | 6           | 63.35                                     | 30             | 4           | 42.93                                     |
