# Supplementary material
Source: MDPI journal article supplement (https://www.mdpi.com/2379-139X/7/2/15)
Supplement: s1 [file s1]

**Supplementary Digital Content SDC2:** HHD Scores [lbs.] for each longitudinal dataset

| ALS Patient# |              | Hip Flexion |       | Knee Flexion |       | Knee Extension |        | Ankle Dorsiflexion |       | Total Lower Limb |        |
|--------------|--------------|-------------|-------|--------------|-------|----------------|--------|--------------------|-------|------------------|--------|
|              |              | Left        | Right | Left         | Right | Left           | Right  | Left               | Right | Left             | Right  |
| 01           | Visit 1 (V1) | 31.40       | 29.90 | 26.60        | 31.90 | 26.10          | 29.10  | 45.70              | 45.00 | 129.80           | 135.90 |
|              | Visit 2 (V2) | 30.60       | 28.70 | 31.60        | 29.10 | 42.40          | 36.90  | 35.40              | 44.60 | 140.00           | 139.30 |
|              | V1 - V2      | 0.80        | 1.20  | -5.00        | 2.80  | -16.30         | -7.80  | 10.30              | 0.40  | -10.20           | -3.40  |
| 02           | Visit 1 (V1) | 32.50       | 15.80 | 21.90        | 14.70 | 29.70          | 16.90  | 0.00               | 0.00  | 84.10            | 47.40  |
|              | Visit 2 (V2) | 7.60        | 7.30  | 7.40         | 4.80  | 11.70          | 5.20   | 0.00               | 0.00  | 26.70            | 17.30  |
|              | V1 - V2      | 24.90       | 8.50  | 14.50        | 9.90  | 18.00          | 11.70  | 0.00               | 0.00  | 57.40            | 30.10  |
| 03           | Visit 1 (V1) | 22.60       | 24.30 | 15.60        | 12.80 | 12.80          | 17.10  | 27.40              | 22.20 | 78.40            | 76.40  |
|              | Visit 2 (V2) | 25.10       | 21.70 | 15.30        | 16.00 | 33.90          | 28.40  | 23.90              | 0.00  | 98.20            | 66.10  |
|              | V1 - V2      | -2.50       | 2.60  | 0.30         | -3.20 | -21.10         | -11.30 | 3.50               | 22.20 | -19.80           | 10.30  |
| 04           | Visit 1 (V1) | 15.50       | 6.00  | 10.90        | 10.40 | 16.30          | 10.70  | 0.00               | 0.00  | 42.70            | 27.10  |
|              | Visit 2 (V2) | 14.30       | 6.00  | 7.00         | 7.00  | 8.00           | 4.00   | 0.00               | 0.00  | 29.30            | 17.00  |
|              | V1 - V2      | 1.20        | 0.00  | 3.90         | 3.40  | 8.30           | 6.70   | 0.00               | 0.00  | 13.40            | 10.10  |
